# Supplementary material for: Structure, Optical and Magnetic Properties of Two Isomeric 2-Bromomethylpyridine Cu(II) Complexes [Cu(C6H9NBr)2(NO3)2] with Very Different Binding Motives
Source: MDPI journal article supplement (doi:10.3390/molecules28020731), 2023-01-11
Supplement: s1 [file s1]

## Supplementary Materials

for

### Structures, optical and magnetic properties of two isomeric 2-bromomethyl pyridine Cu(II) complexes $[\text{Cu}(\text{C}_6\text{H}_9\text{NBr})_2(\text{NO}_3)_2]$ with very different binding motives

Fatma Garci <sup>a,b</sup>, Hammouda Chebbi <sup>a,c,\*</sup>, Nahal Rouzbeh <sup>d</sup>, Leonhard Rochels <sup>d</sup>, Sabrina Disch <sup>d</sup>,  
Alexander Haseloer <sup>b</sup>, Sean S. Sebastian <sup>b</sup>, Uwe Ruschewitz <sup>b</sup>, Eric Tobechukwu Anthony <sup>b</sup>,  
Axel Klein <sup>b,\*</sup>, Mohamed Faouzi Zid <sup>a,\*</sup>

#### Contents

**Figure S1.** Views on the crystal structure of  $[\text{Cu}(\text{L}^2)_2(\text{NO}_3)_2]$  ( $\text{L}^2$  = 2-bromo-4-methylpyridine) along the crystallographic *b* axis.

**Figure S2.** X-ray powder diffractogram of  $[\text{Cu}(\text{L}^1)_2(\text{NO}_3)_2]$  ( $\text{L}^1$  = 2-bromo-5-methylpyridine) measured with Cu- $\text{K}\alpha$  radiation in reflection geometry with the calculated pattern for the corresponding single crystal structure.

**Figure S3.** X-ray powder diffractogram of  $[\text{Cu}(\text{L}^2)_2(\text{NO}_3)_2]$  ( $\text{L}^2$  = 2-bromo-4-methylpyridine) measured with Cu- $\text{K}\alpha$  radiation in reflection geometry with the calculated pattern for the corresponding single crystal structure.

**Figure S4.** View of the Hirshfeld surfaces mapped over  $d_{\text{norm}}$  and Hirshfeld two-dimensional fingerprint plots for  $[\text{Cu}(\text{L}^1)_2(\text{NO}_3)_2]$  and  $[\text{Cu}(\text{L}^2)_2(\text{NO}_3)_2]$ .

**Figure S5.** Energy frameworks constructed for Coulomb energy, dispersion energy and total energy for the both compounds  $[\text{Cu}(\text{L}^1)_2(\text{NO}_3)_2]$  ( $\text{L}^1$  = 2-bromo-5-methylpyridine) in  $P2_1/c$  and  $[\text{Cu}(\text{L}^2)_2(\text{NO}_3)_2]$  ( $\text{L}^2$  = 2-bromo-4-methylpyridine) in  $P\bar{1}$ .

**Figure S6.** FT-IR spectra of the complexes  $[\text{Cu}(\text{L}^1)_2(\text{NO}_3)_2]$  ( $\text{L}^1$  = 2-bromo-5-methylpyridine) in  $P2_1/c$  and  $[\text{Cu}(\text{L}^2)_2(\text{NO}_3)_2]$  ( $\text{L}^2$  = 2-bromo-4-methylpyridine) in  $P\bar{1}$ .

**Figure S7.** Raman spectra of the complexes  $[\text{Cu}(\text{L}^1)_2(\text{NO}_3)_2]$  ( $\text{L}^1$  = 2-bromo-5-methylpyridine) in  $P2_1/c$  and  $[\text{Cu}(\text{L}^2)_2(\text{NO}_3)_2]$  ( $\text{L}^2$  = 2-bromo-4-methylpyridine) in  $P\bar{1}$ .

**Figure S8.** TG-DTA curves of  $[\text{Cu}(\text{L}^1)_2(\text{NO}_3)_2]$  and  $[\text{Cu}(\text{L}^2)_2(\text{NO}_3)_2]$ .

**Figure S9.** UV-vis absorption spectra of the ligands  $\text{L}^1$  = 2-bromo-5-methylpyridine and  $\text{L}^2$  = 2-bromo-4-methylpyridine in EtOH.

**Figure S10.** X-band EPR spectrum of  $[\text{Cu}(\text{L}^1)_2(\text{NO}_3)_2]$ , ( $\text{L}^1$  = 2-bromo-5-methylpyridine) at 9.645555 GHz and 298 K with simulation.

**Figure S11.** X-band EPR spectrum of  $[\text{Cu}(\text{L}^2)_2(\text{NO}_3)_2]$ , ( $\text{L}^2$  = 2-bromo-4-methylpyridine) at 9.642502 GHz and 298 K with simulation.

**Table S1.** Structure solution and refinement data for the two isomeric forms of  $[\text{Cu}(\text{L})_2(\text{NO}_3)_2]$ .

**Table S2.** Selected metrical data of the isomeric forms of  $[\text{Cu}(\text{L})_2(\text{NO}_3)_2]$ .

**Table S3.** Hydrogen bond details of the isomeric forms of  $[\text{Cu}(\text{L})_2(\text{NO}_3)_2]$ .

**Table S4.** Interaction energies (kJ/mol) of the molecular pairs calculated from energy framework calculation of  $[\text{Cu}(\text{L}^1)_2(\text{NO}_3)_2]$  and  $[\text{Cu}(\text{L}^2)_2(\text{NO}_3)_2]$ .

## Supplementary Figures

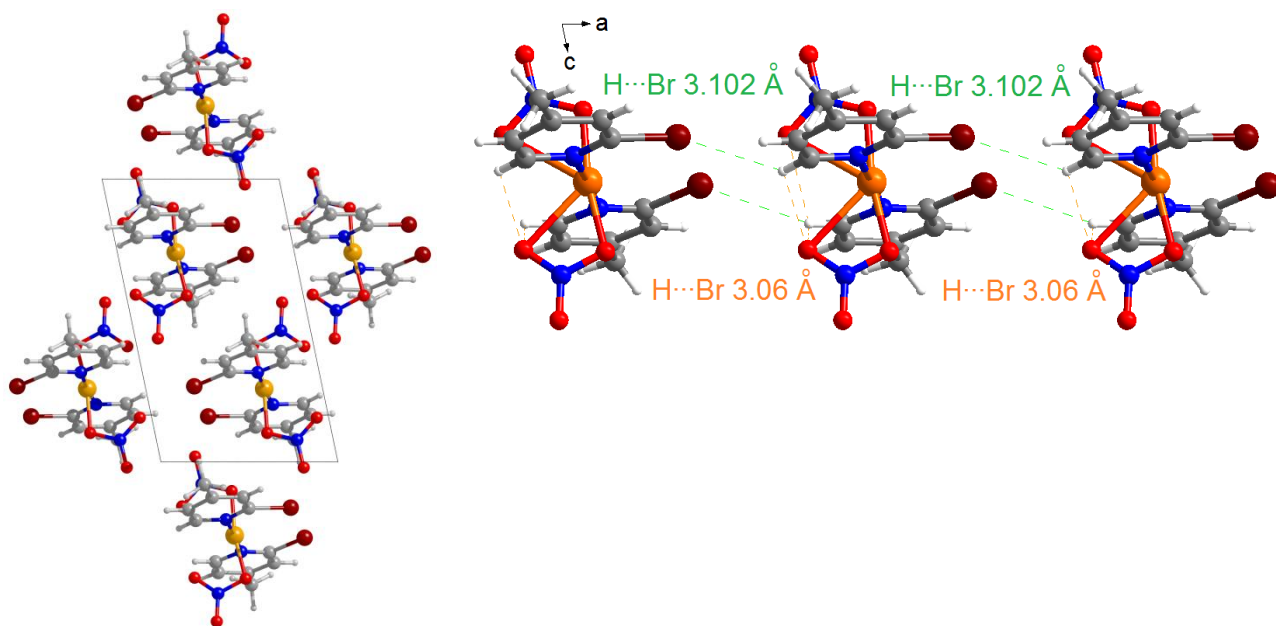

**Figure S1.** Views on the crystal structure of  $[\text{Cu}(\text{L}^2)_2(\text{NO}_3)_2]$  ( $\text{L}^2 = 2\text{-bromo-4-methylpyridine}$ ) along the crystallographic  $b$  axis.

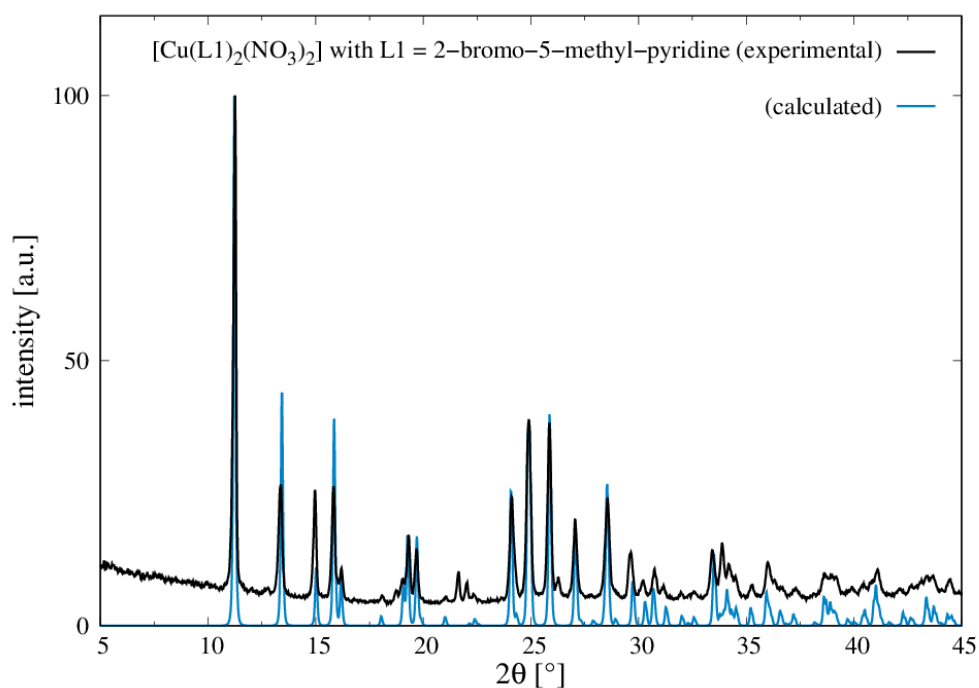

**Figure S2.** X-ray powder diffractogram of  $[\text{Cu}(\text{L}^1)_2(\text{NO}_3)_2]$  ( $\text{L}^1 = 2\text{-bromo-5-methylpyridine}$ ) measured with  $\text{Cu-K}\alpha$  radiation in reflection geometry (black) compared with a pattern simulated (blue) from the corresponding single crystal structure.

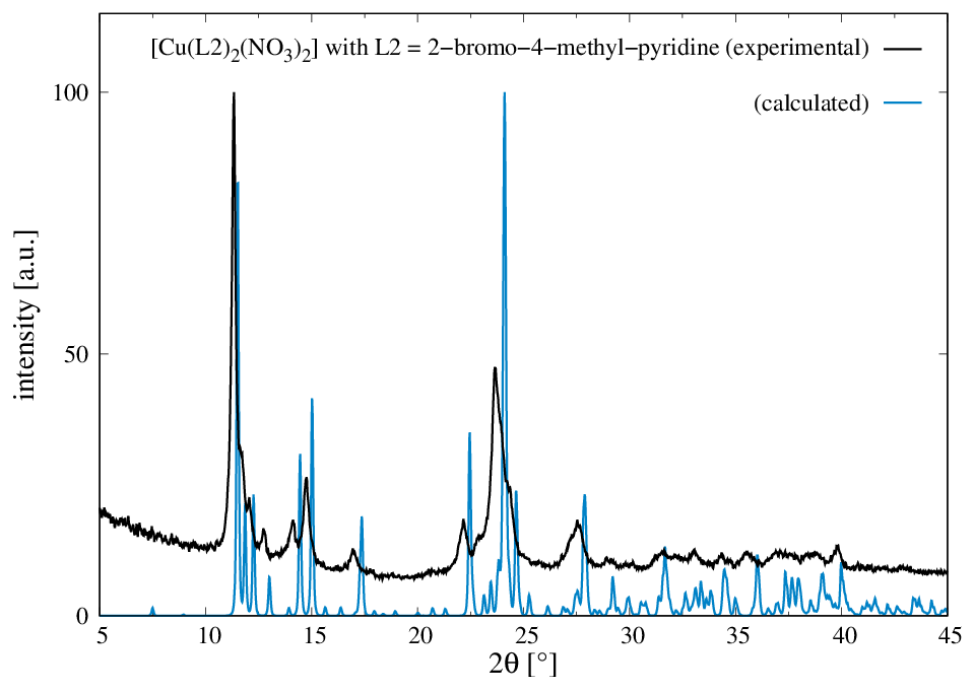

**Figure S3.** X-ray powder diffractogram of  $[\text{Cu}(\text{L}^2)_2(\text{NO}_3)_2]$  ( $\text{L}^2 = 2\text{-bromo-4-methylpyridine}$ ) measured with  $\text{Cu-K}\alpha$  radiation in reflection geometry (black) compared with a pattern simulated (blue) from the corresponding single crystal structure. Note: the positions of the Bragg reflections of the experimental and the simulated patterns differ due to different temperatures of the respective measurements (single-crystal data: 150(2) K; powder diffraction: 293(2) K).

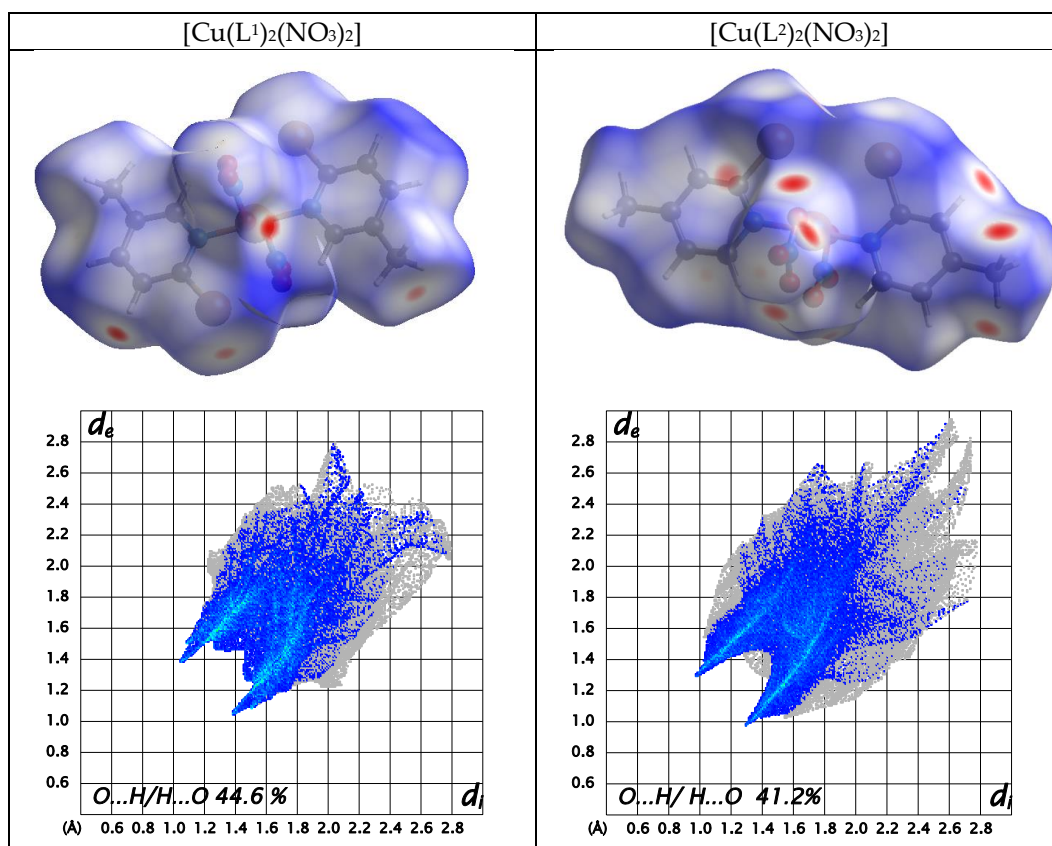

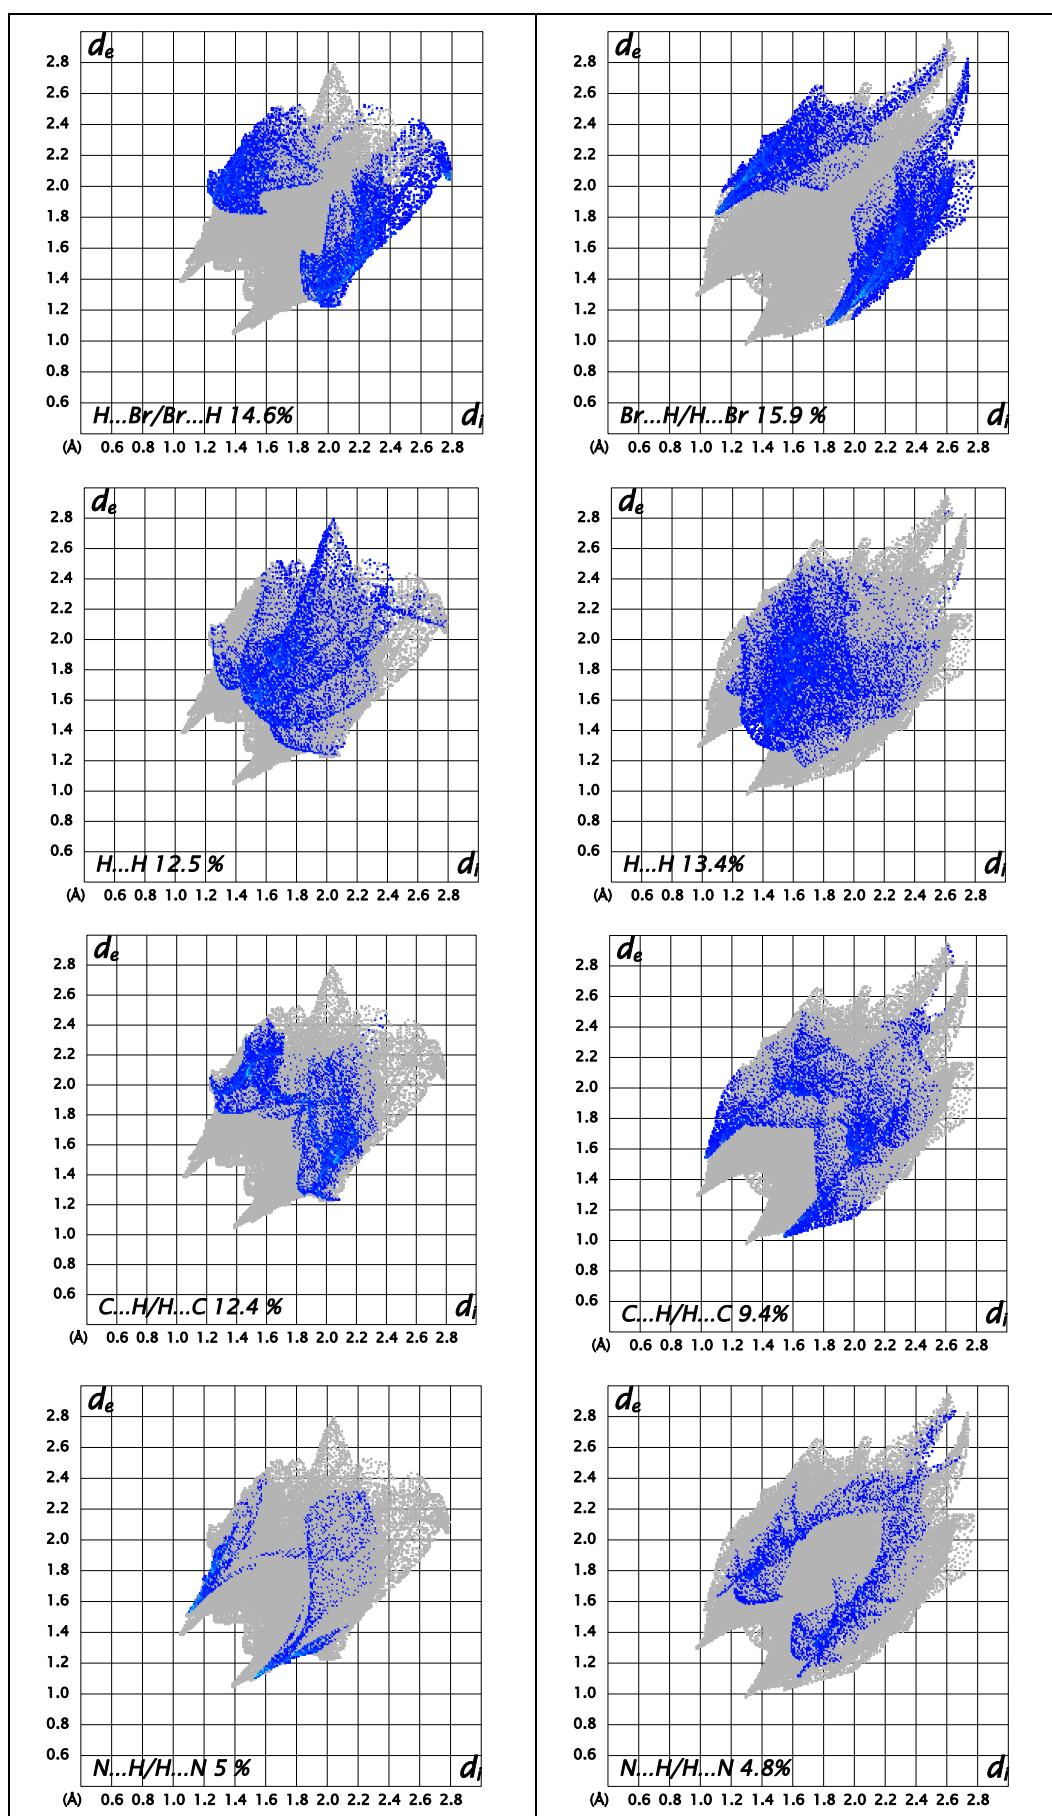

**Figure S4.** View of the Hirshfeld surfaces mapped over  $d_{\text{norm}}$  and Hirshfeld two-dimensional fingerprint plots for  $[\text{Cu}(\text{L}^1)_2(\text{NO}_3)_2]$  and  $[\text{Cu}(\text{L}^2)_2(\text{NO}_3)_2]$ .

|                   | $[\text{Cu}(\text{L}^1)_2(\text{NO}_3)_2]$<br>along $a$ -axis                       | $[\text{Cu}(\text{L}^2)_2(\text{NO}_3)_2]$<br>along $b$ -axis                        |
|-------------------|-------------------------------------------------------------------------------------|--------------------------------------------------------------------------------------|
| Coulomb energy    | 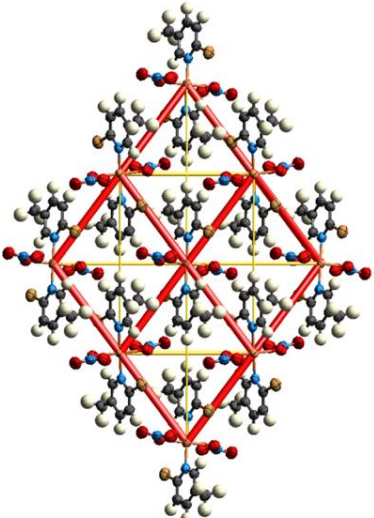   |    |
| Dispersion energy |   |   |
| Total energy      |  |  |

**Figure S5.** Energy frameworks constructed for Coulomb energy, dispersion energy and total energy for the both compounds  $[\text{Cu}(\text{L}^1)_2(\text{NO}_3)_2]$  ( $\text{L}^1$  = 2-bromo-5-methylpyridine) in  $P2_1/c$  and  $[\text{Cu}(\text{L}^2)_2(\text{NO}_3)_2]$  ( $\text{L}^2$  = 2-bromo-4-methylpyridine) in  $P\bar{1}$ .



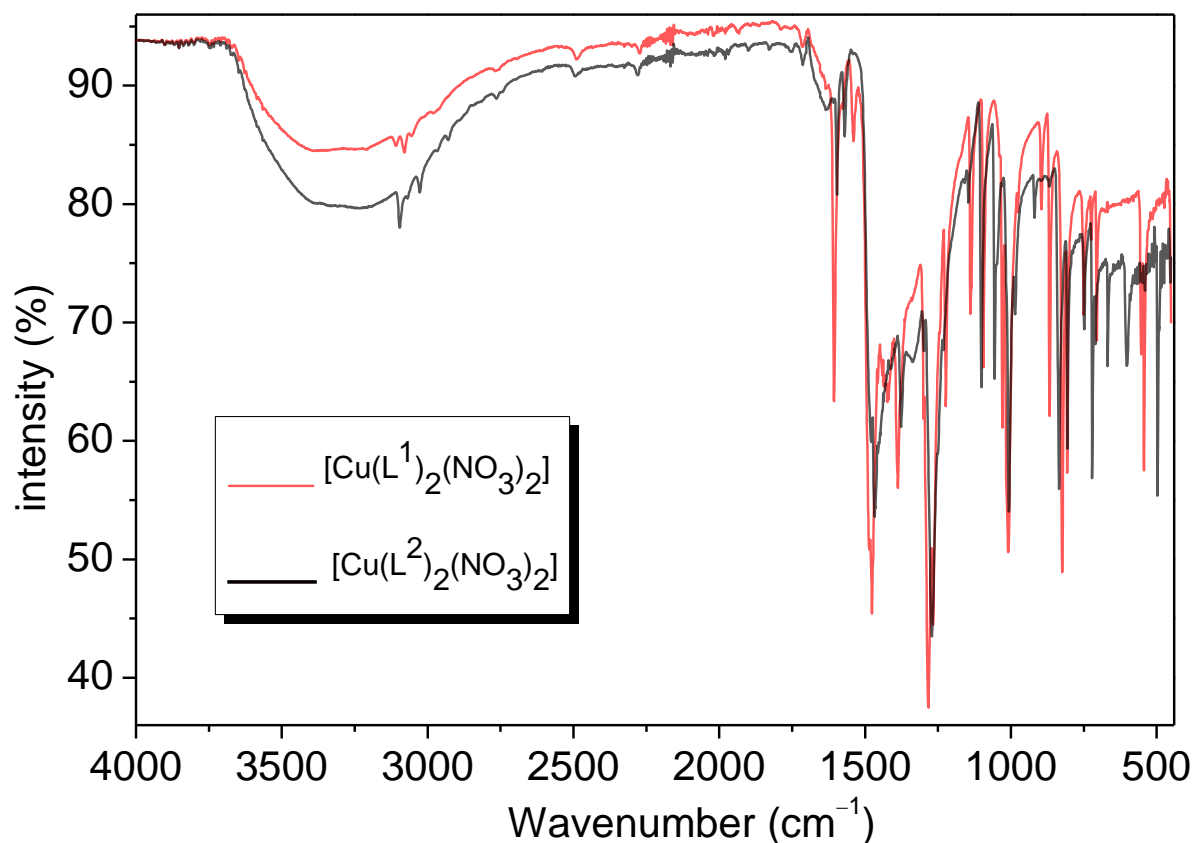

**Figure S6.** FT-IR spectra of the complexes  $[\text{Cu}(\text{L}^1)_2(\text{NO}_3)_2]$  ( $\text{L}^1 = 2\text{-bromo-5-methylpyridine}$ ) in  $P2_1/c$  (red) and  $[\text{Cu}(\text{L}^2)_2(\text{NO}_3)_2]$  ( $\text{L}^2 = 2\text{-bromo-4-methylpyridine}$ ) in  $P\bar{1}$  (black).

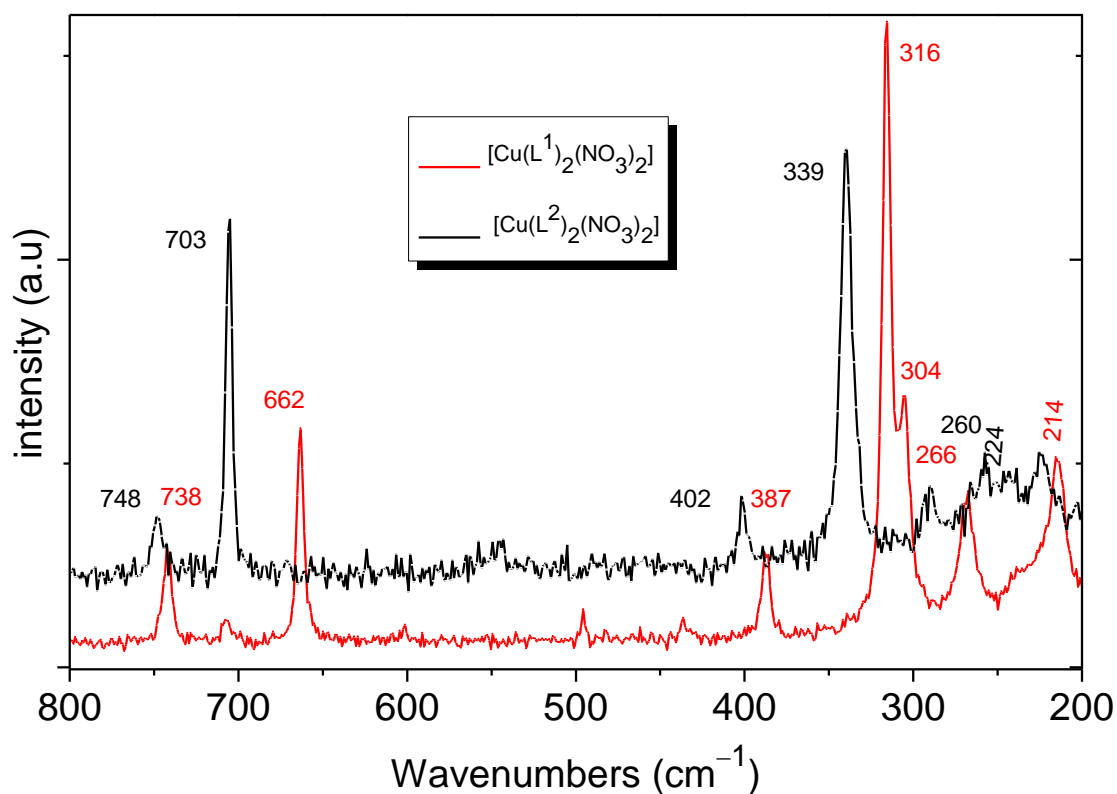

**Figure S7.** Raman spectra of the complexes  $[\text{Cu}(\text{L}^1)_2(\text{NO}_3)_2]$  ( $\text{L}^1 = 2\text{-bromo-5-methylpyridine}$ ) in  $P2_1/c$  (red) and  $[\text{Cu}(\text{L}^2)_2(\text{NO}_3)_2]$  ( $\text{L}^2 = 2\text{-bromo-4-methylpyridine}$ ) in  $P\bar{1}$  (black).

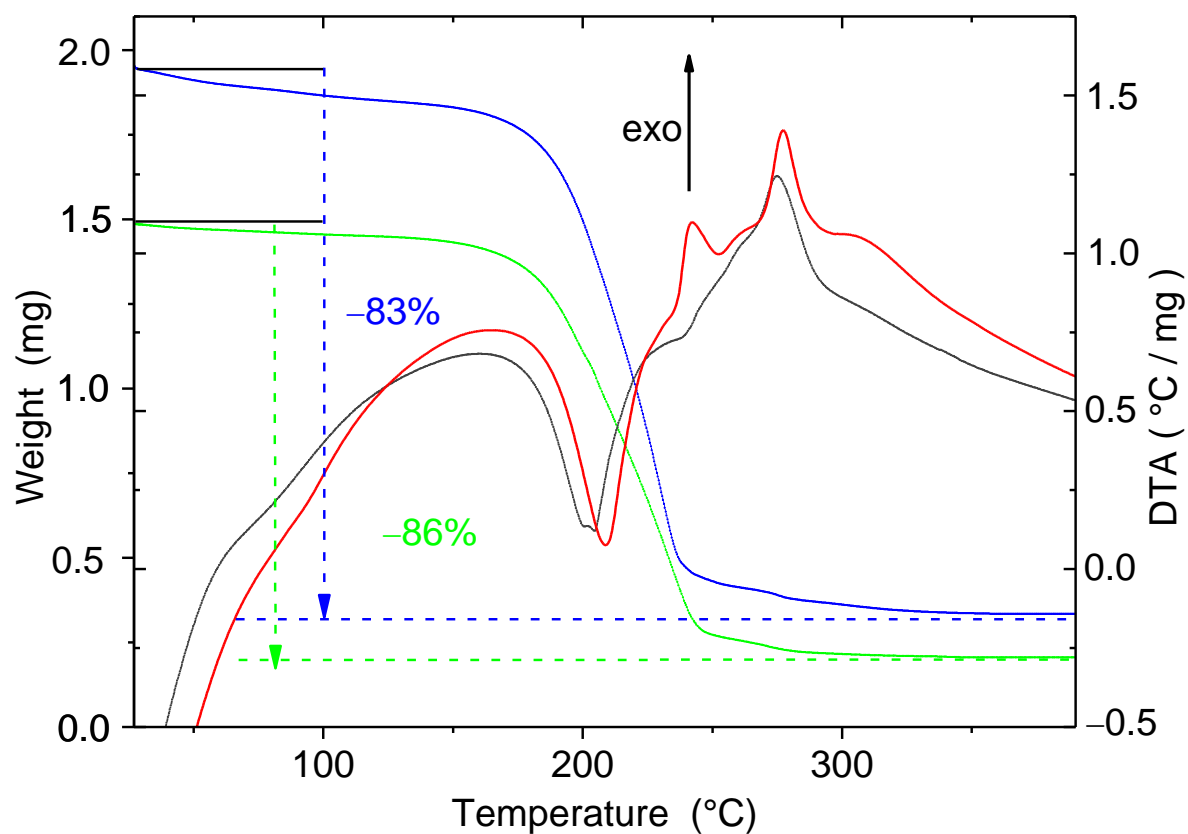

**Figure S8.** TG-DTA curves of  $[\text{Cu}(\text{L}^1)_2(\text{NO}_3)_2]$  (blue and black lines) and  $[\text{Cu}(\text{L}^2)_2(\text{NO}_3)_2]$  (green and red lines).

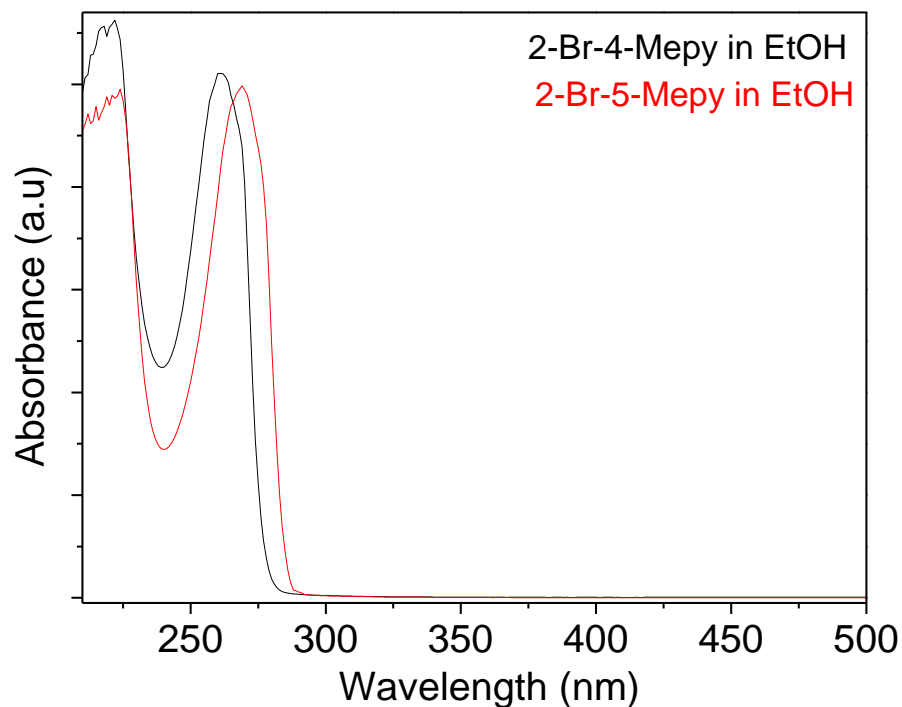

**Figure S9.** UV-vis absorption spectra of the ligands  $\text{L}^1$  = 2-bromo-5-methylpyridine (red) and  $\text{L}^2$  = 2-bromo-4-methylpyridine (black) in EtOH.

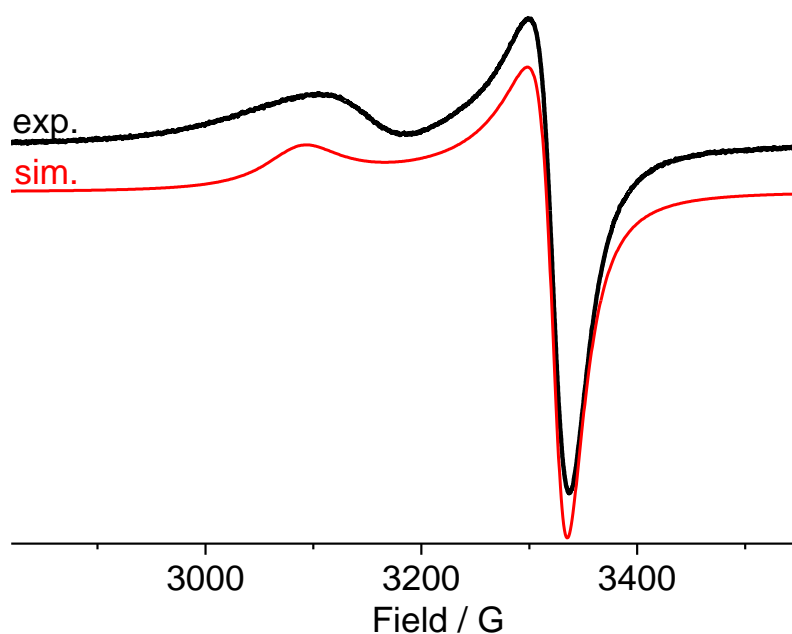

**Figure S10.** X-band EPR spectrum of  $[\text{Cu}(\text{L}^1)_2(\text{NO}_3)_2]$ , ( $\text{L}^1 = 2\text{-bromo-5-methylpyridine}$ ) at 9.645555 GHz and 298 K. Receiver gain: 40, attenuation: 25 dB (0.3162 mW) (black), with simulation using  $g_{\parallel} = 2.230$ ,  $g_{\perp} = 2.070$ , and line width 50, 27 and 27 G (red). This makes  $g_{\text{av}} = 2.123$ ;  $\Delta g = 0.160$ .

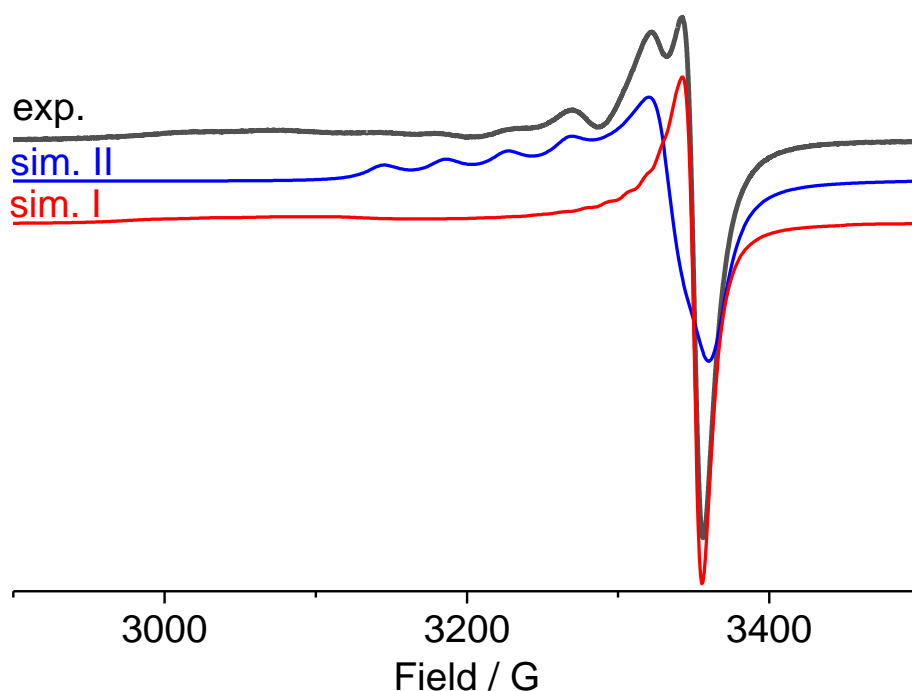

**Figure S11.** X-band EPR spectrum of  $[\text{Cu}(\text{L}^2)_2(\text{NO}_3)_2]$ , ( $\text{L}^2 = 2\text{-bromo-4-methylpyridine}$ ) at 9.642502 GHz and 298 K. Receiver gain: 40, attenuation: 25 dB (0.3162 mW) (black), with simulation using  $g_{\parallel} = 2.260$ ,  $g_{\perp} = 2.057$  and line width 95, 22 and 22 G (red). This makes  $g_{\text{av}} = 2.125$ ;  $\Delta g = 0.203$ . A minor species is simulated using  $g_{\parallel} = 2.1352$ ,  $g_{\perp} = 2.057$ ,  $A_{\parallel\text{Cu}} = 40$  G, and line width 15, 10 and 10 Gauss. This makes  $g_{\text{av}} = 2.083$ ;  $\Delta g = 0.078$  (blue line).



## Supplementary Tables

**Table S1.** Structure solution and refinement data for the two isomeric forms of [Cu(L)<sub>2</sub>(NO<sub>3</sub>)<sub>2</sub>]

|                                                     | L <sup>1</sup> = 2-bromo-5-methylpyridine                       | L <sup>2</sup> = 2-bromo-4-methylpyridine                        |
|-----------------------------------------------------|-----------------------------------------------------------------|------------------------------------------------------------------|
| Formula weight (g mol <sup>-1</sup> )               | 531.62                                                          | 531.62                                                           |
| Crystalsystem                                       | monoclinic                                                      | triclinic                                                        |
| Temperature (K)                                     | 293(2)                                                          | 150(2)                                                           |
| Space group                                         | <i>P</i> 2 <sub>1</sub> / <i>c</i>                              | <i>P</i> $\bar{1}$                                               |
| cell <i>a</i> (Å)                                   | 6.7738(7)                                                       | 7.4916(5)                                                        |
| <i>b</i> (Å)                                        | 13.1890(9)                                                      | 10.0404(7)                                                       |
| <i>c</i> (Å)                                        | 10.0999(10)                                                     | 12.0723(8)                                                       |
| $\alpha$ (°)                                        | 90                                                              | 86.176(6)                                                        |
| $\beta$ (°)                                         | 103.298(8)                                                      | 77.769(5)                                                        |
| $\gamma$ (°)                                        | 90                                                              | 79.793(5)                                                        |
| <i>V</i> (Å <sup>3</sup> )                          | 878.13(14)                                                      | 873.00(10)                                                       |
| <i>Z</i>                                            | 2                                                               | 2                                                                |
| Abs. coefficient (mm <sup>-1</sup> )                | 5.830                                                           | 5.865                                                            |
| Density calcd. (g cm <sup>-3</sup> )                | 2.011                                                           | 2.022                                                            |
| <i>F</i> (000)                                      | 518                                                             | 518                                                              |
| $\theta$ range (°)                                  | 2.584 to 29.354                                                 | 1.727 to 29.142                                                  |
| Index range                                         | -9 ≤ <i>h</i> ≤ 9<br>-18 ≤ <i>k</i> ≤ 18<br>-13 ≤ <i>l</i> ≤ 13 | -8 ≤ <i>h</i> ≤ 10<br>-13 ≤ <i>k</i> ≤ 13<br>-16 ≤ <i>l</i> ≤ 16 |
| completeness to $\theta = 25.35^\circ$              | 100%                                                            | 98.8%                                                            |
| Reflections collected ( <i>R</i> <sub>int</sub> )   | 16219 (0.102)                                                   | 10362 (0.065)                                                    |
| Independent refl. ( <i>R</i> <sub>sigma</sub> )     | 2401 (0.046)                                                    | 4614 (0.065)                                                     |
| Goodness-of-fit on <i>F</i> <sup>2</sup>            | 1.01                                                            | 1.02                                                             |
| Weighting scheme ( $P = (F_o^2 + 2F_c^2)/3$ )       | $w = [\sigma^2(F_o^2) + (0.1161P)^2]^{-1}$                      | $w = [\sigma^2(F_o^2) + (0.0532P)^2 + 0.6888P]^{-1}$             |
| Extinct. coefficient                                | 0.026(4)                                                        | -                                                                |
| Final <i>R</i> indices [ <i>I</i> > 2σ( <i>I</i> )] | 0.063                                                           | 0.041                                                            |
| <i>R</i> indices (all data)                         | 0.100                                                           | 0.069                                                            |
| Largest diff. peak / hole (e Å <sup>-3</sup> )      | -0.78 / 0.69                                                    | -1.02 / 0.65                                                     |
| CCDC                                                | 2207776                                                         | 2207769                                                          |

**Table S2.** Selected metrical data of the isomeric forms of [Cu(L)<sub>2</sub>(NO<sub>3</sub>)<sub>2</sub>].

| distances (Å)                           | L <sup>1</sup> = 2-bromo-5-methylpyridine | L <sup>2</sup> = 2-bromo-4-methylpyridine |
|-----------------------------------------|-------------------------------------------|-------------------------------------------|
| Cu–O1                                   | 2.030(5)                                  | 1.967(2)                                  |
| Cu–O1 <sup>i</sup> (L <sup>1</sup> )    | 2.030(5)                                  |                                           |
| Cu–O6 (L <sup>2</sup> )                 |                                           | 2.4462(2)                                 |
| Cu–O2                                   | 2.515(7)                                  | 2.445(3)                                  |
| Cu–O2 <sup>i</sup> (L <sup>1</sup> )    | 2.515(7)                                  |                                           |
| Cu–O4 (L <sup>2</sup> )                 |                                           | 1.967(3)                                  |
| Cu–N1                                   | 1.990(5)                                  | 2.007(3)                                  |
| Cu–N1 <sup>i</sup> (L <sup>1</sup> )    | 1.990(5)                                  |                                           |
| Cu–N2 (L <sup>2</sup> )                 |                                           | 2.013(3)                                  |
| Cu···N3                                 | 2.673(6)                                  | 2.609(4)                                  |
| Cu···Br1                                | 3.328(9)                                  | 3.2614(2)                                 |
| Cu···Br1 <sup>i</sup> (L <sup>1</sup> ) | 3.328(9)                                  |                                           |
| Cu···Br2 (L <sup>2</sup> )              |                                           | 3.2621(7)                                 |

|                                         |          |           |
|-----------------------------------------|----------|-----------|
| Br··Br                                  |          | 3.6929(8) |
| angles (°)                              |          |           |
| N1–Cu–N1 <sup>i</sup> (L <sup>1</sup> ) | 180.00   |           |
| N1–Cu–N2(L <sup>2</sup> )               |          | 177.3(1)  |
| N1–Cu–O2(L <sup>1</sup> )               | 89.7(2)  |           |
| N1–Cu–O1(L <sup>2</sup> )               |          | 90.4(1)   |
| N1–Cu–O2 <sup>i</sup> (L <sup>1</sup> ) | 88.0(2)  |           |
| N1–Cu–O4(L <sup>2</sup> )               |          | 89.6(1)   |
| O2–Cu–O2 <sup>i</sup> (L <sup>1</sup> ) | 180.00   |           |
| O4–Cu–O1(L <sup>2</sup> )               |          | 170.2(1)  |
| Cu–O1–N3(L <sup>1</sup> )               | 105.7(4) |           |
| Cu–O1–N3(L <sup>2</sup> )               |          | 102.7(2)  |
| Cu–O1–N3 <sup>i</sup> (L <sup>1</sup> ) | 152.7(4) |           |
| Cu–O4–N4(L <sup>2</sup> )               |          | 109.7(3)  |
| CCDC                                    | 2207776  | 2207769   |

Symmetry code: (i)  $-x+2, -y, -z+2$ .

**Table S3.** Hydrogen bond details of the isomeric forms of  $[\text{Cu}(\text{L})_2(\text{NO}_3)_2]^{\text{a}}$ .

| L <sup>1</sup> = 2-bromo-5-methylpyridine in $P2_1/c$ |                               |                   |                   |                 | L <sup>2</sup> = 2-bromo-4-methylpyridine in $P\bar{1}$ |                               |                   |                   |                 |
|-------------------------------------------------------|-------------------------------|-------------------|-------------------|-----------------|---------------------------------------------------------|-------------------------------|-------------------|-------------------|-----------------|
| D–H··A                                                | d <sub>D–H</sub> <sup>b</sup> | d <sub>H··A</sub> | d <sub>D··A</sub> | angle<br>D–H··A | D–H··A                                                  | d <sub>D–H</sub> <sup>b</sup> | d <sub>H··A</sub> | d <sub>D··A</sub> | angle<br>D–H··A |
| C4–H4··O2                                             | 0.930                         | 2.576             | 3.482             | 164             | C4–H4··O3                                               | 0.930                         | 2.586             | 3.513             | 174             |
| C6–H6A··O3                                            | 0.960                         | 2.580             | 3.477             | 155             | C7–H7··O6                                               | 0.930                         | 2.556             | 3.074             | 115             |
| C6–H6C··Br1                                           | 0.960                         | 2.930             | 3.740             | 143             | C10–H10··O5                                             | 0.930                         | 2.493             | 3.371             | 157             |
|                                                       |                               |                   |                   |                 | C12–H12A··O6                                            | 0.960                         | 2.480             | 3.298             | 143             |
|                                                       |                               |                   |                   |                 | C12–H12C··O4                                            | 0.960                         | 2.390             | 3.236             | 147             |

<sup>a</sup> Distances d (Å) and angles (°). <sup>b</sup> Distances fixed through AFIX instructions.

**Table S4.** Interaction energies (kJ/mol) of the molecular pairs calculated from energy framework calculation of  $[\text{Cu}(\text{L}^1)_2(\text{NO}_3)_2]$  (top) and  $[\text{Cu}(\text{L}^2)_2(\text{NO}_3)_2]$  (bottom).<sup>a</sup>

$[\text{Cu}(\text{L}^1)_2(\text{NO}_3)_2]$ :

|  | N | Symmetry operation | R     | Electron Density | $E_{\text{ele}}$ | $E_{\text{pol}}$ | $E_{\text{dis}}$ | $E_{\text{rep}}$ | $E_{\text{tot}}$ |
|--|---|--------------------|-------|------------------|------------------|------------------|------------------|------------------|------------------|
|  | 1 | x, y, z            | 6.77  | HF/3-21G         | −19.5            | −12.6            | −48.4            | 27.0             | −49.7            |
|  | 4 | −x, y+1/2, −z+1/2  | 8.31  | HF/3-21G         | −29.3            | −11.4            | −47.1            | 22.9             | −61.2            |
|  | 2 | −x, y+1/2, −z+1/2  | 9.96  | HF/3-21G         | −17.1            | −5.1             | −8.6             | 3.3              | −25.8            |
|  | 1 | x, y, z            | 13.19 | HF/3-21G         | 5.2              | −1.3             | −4.0             | 0.1              | 0.1              |
|  | 2 | −x, y+1/2, −z+1/2  | 11.43 | HF/3-21G         | 0.5              | −0.5             | −8.4             | 5.6              | −2.9             |
|  | 0 | x, y, z            | 10.79 | HF/3-21G         | 14.5             | −1.3             | −1.8             | 0.0              | 12.4             |
|  | 1 | x, y, z            | 14.83 | HF/3-21G         | 5.9              | −0.8             | −2.3             | 0.0              | 3.5              |

$[\text{Cu}(\text{L}^2)_2(\text{NO}_3)_2]$ :

|  | N | Symmetry operation | R     | Electron Density | $E_{\text{ele}}$ | $E_{\text{pol}}$ | $E_{\text{dis}}$ | $E_{\text{rep}}$ | $E_{\text{tot}}$ |
|--|---|--------------------|-------|------------------|------------------|------------------|------------------|------------------|------------------|
|  | 1 | x, y, z            | 10.04 | HF/3-21G         | −18.3            | −7.8             | −47.4            | 25.0             | −46.2            |
|  | 0 | −x, −y, −z         | 9.50  | HF/3-21G         | −30.4            | −11.5            | −35.1            | 26.3             | −48.8            |
|  | 1 | x, y, z            | 7.49  | HF/3-21G         | 0.3              | −5.0             | −25.4            | 13.9             | −14.7            |
|  | 0 | −x, −y, −z         | 7.58  | HF/3-21G         | −43.2            | −17.8            | −62.4            | 37.6             | −81.3            |
|  | 0 | −x, −y, −z         | 9.87  | HF/3-21G         | −35.6            | −10.2            | −17.9            | 10.5             | −50.5            |
|  | 1 | −x, −y, −z         | 8.68  | HF/3-21G         | −5.2             | −9.6             | −17.6            | 6.7              | −22.0            |
|  | 1 | x, y, z            | 11.41 | HF/3-21G         | −1.3             | −1.5             | −8.7             | 2.1              | −8.4             |
|  | 1 | −x, −y, −z         | 7.88  | HF/3-21G         | −48.3            | −17.8            | −45.4            | 32.9             | −75.0            |
|  | 1 | −x, −y, −z         | 16.37 | HF/3-21G         | 3.8              | −0.6             | −2.2             | 0.2              | 1.6              |

|                                     |          |       |                  |                  |                  |                  |     |     |
|-------------------------------------|----------|-------|------------------|------------------|------------------|------------------|-----|-----|
| 0                                   | -x,-y,-z | 15.87 | HF/3-21G         | 5.3              | -0.9             | -5.4             | 2.5 | 2.0 |
| 1                                   | -x,-y,-z | 15.96 | HF/3-21G         | 4.3              | -0.4             | -1.4             | 0.0 | 2.8 |
| Energy model                        |          |       | $K_{\text{ele}}$ | $K_{\text{pol}}$ | $K_{\text{dis}}$ | $K_{\text{rep}}$ |     |     |
| CE-HF...HF/3-21G electron densities |          |       | 1.019            | 0.651            | 0.901            | 0.811            |     |     |

<sup>a</sup> R is the distance between molecular centroids (mean atomic position) in Å.
